# Supplementary material for: Modification in the side chain of solomonsterol A: discovery of cholestan disulfate as a potent pregnane-X-receptor agonist
Source: Royal Society of Chemistry journal article supplement (doi:10.1039/c2ob25800e), 2012-01-01

# Modification in the side chain of solomonsterol A: discovery of cholestan disulfate as a potent pregnane-X-receptor agonist

Valentina Sepe, Raffaella Ummarino, Maria Valeria D'Auria, Gianluigi Lauro, Giuseppe Bifulco, Claudio D'Amore, Barbara Renga, Stefano Fiorucci, and Angela Zampella\*

|                                           |          |
|-------------------------------------------|----------|
| Table of contents                         | page S1  |
| <sup>1</sup> H-NMR spectrum of <b>2</b>   | page S2  |
| <sup>1</sup> H-NMR spectrum of <b>3</b>   | page S3  |
| <sup>13</sup> C-NMR spectrum of <b>3</b>  | page S4  |
| <sup>1</sup> H-NMR spectrum of <b>4</b>   | page S5  |
| <sup>13</sup> C-NMR spectrum of <b>4</b>  | page S6  |
| <sup>1</sup> H-NMR spectrum of <b>5</b>   | page S7  |
| <sup>13</sup> C-NMR spectrum of <b>5</b>  | page S8  |
| <sup>1</sup> H-NMR spectrum of <b>6</b>   | page S9  |
| <sup>13</sup> C-NMR spectrum of <b>6</b>  | page S10 |
| <sup>1</sup> H-NMR spectrum of <b>7</b>   | page S11 |
| <sup>13</sup> C-NMR spectrum of <b>7</b>  | page S12 |
| <sup>1</sup> H-NMR spectrum of <b>8</b>   | page S13 |
| <sup>13</sup> C-NMR spectrum of <b>8</b>  | page S14 |
| <sup>1</sup> H-NMR spectrum of <b>9</b>   | page S15 |
| <sup>1</sup> H-NMR spectrum of <b>10</b>  | page S16 |
| HPLC trace of <b>2</b> and <b>3</b>       | page S17 |
| HPLC trace of <b>4, 5, 6</b> and <b>7</b> | page S18 |
| HPLC trace of <b>8, 9</b> and <b>10</b>   | page S19 |
| HPLC trace of <b>11</b>                   | page S20 |

$^1\text{H}$  NMR (400 MHz,  $\text{CD}_3\text{OD}$ ) of **2**

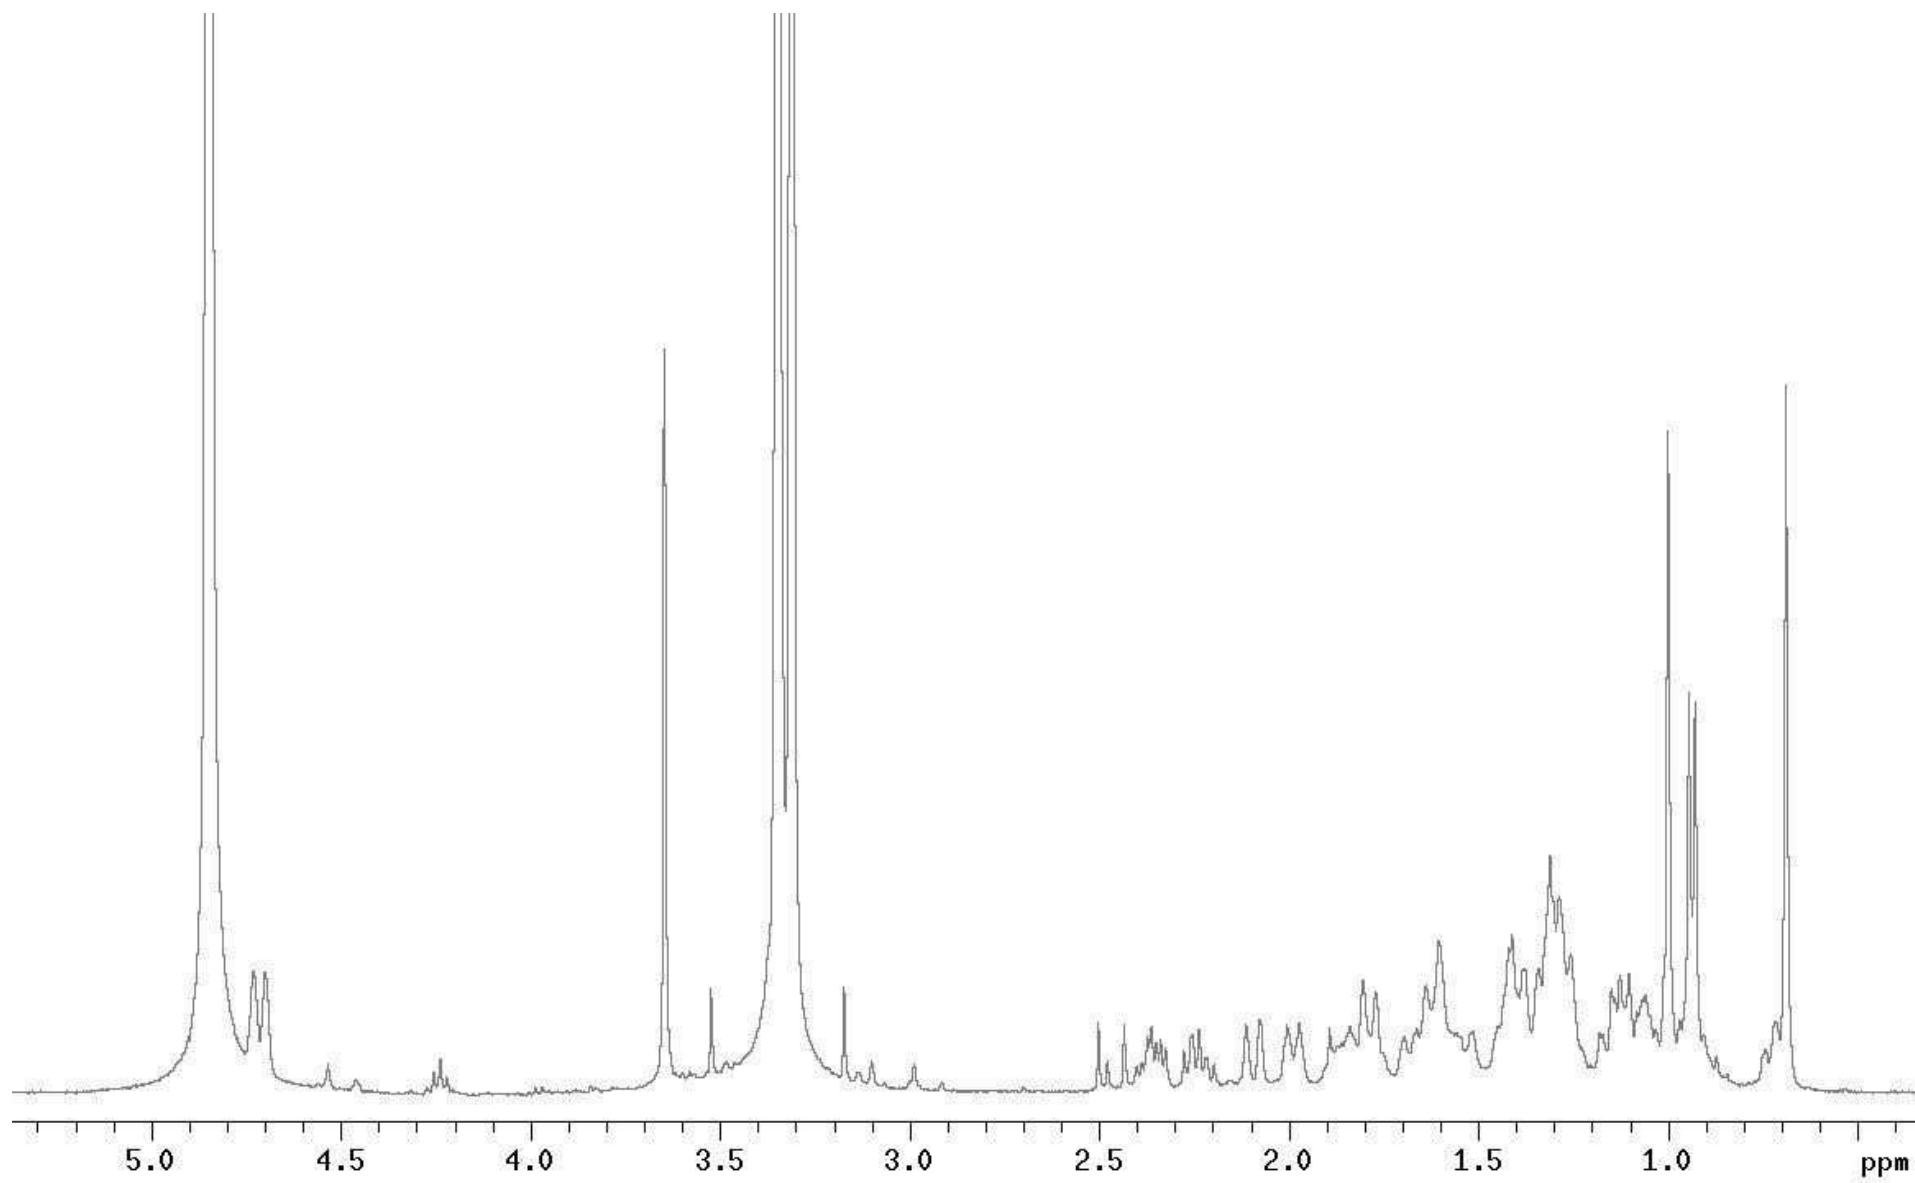

$^1\text{H}$  NMR (400 MHz,  $\text{CD}_3\text{OD}$ ) of **3**

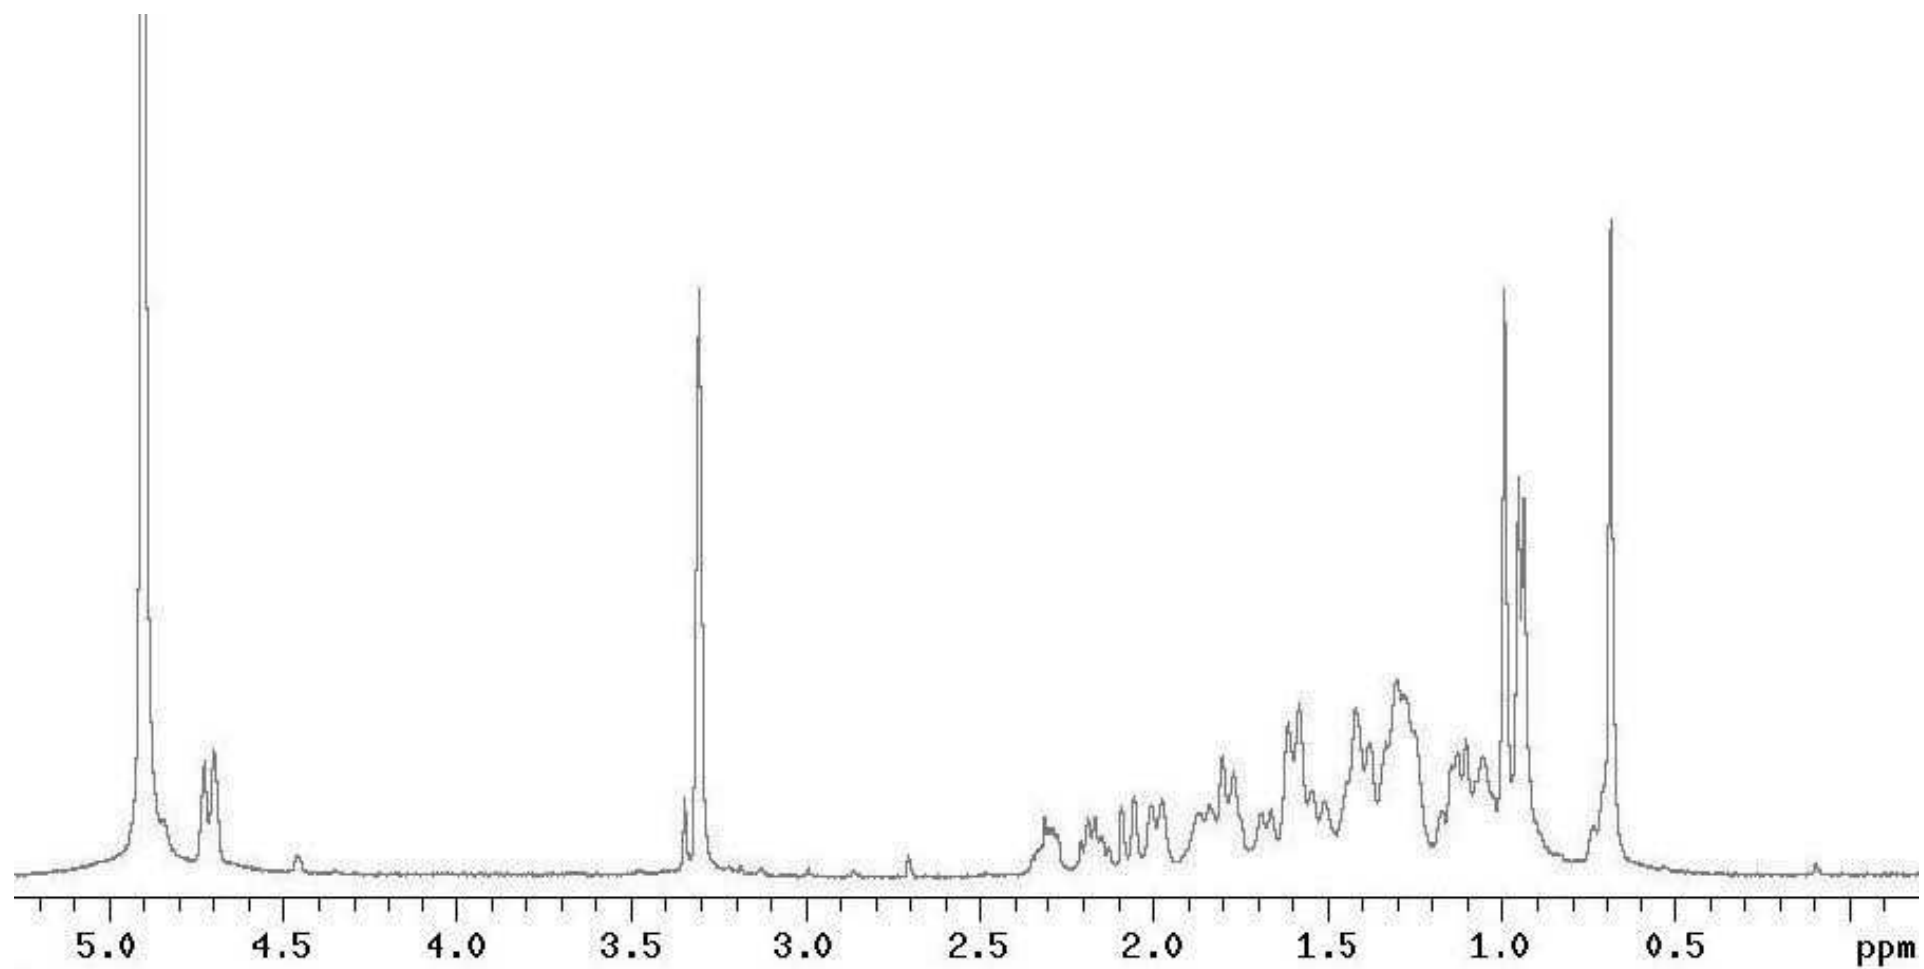

$^{13}\text{C}$  NMR (100 MHz,  $\text{CD}_3\text{OD}$ ) of **3**

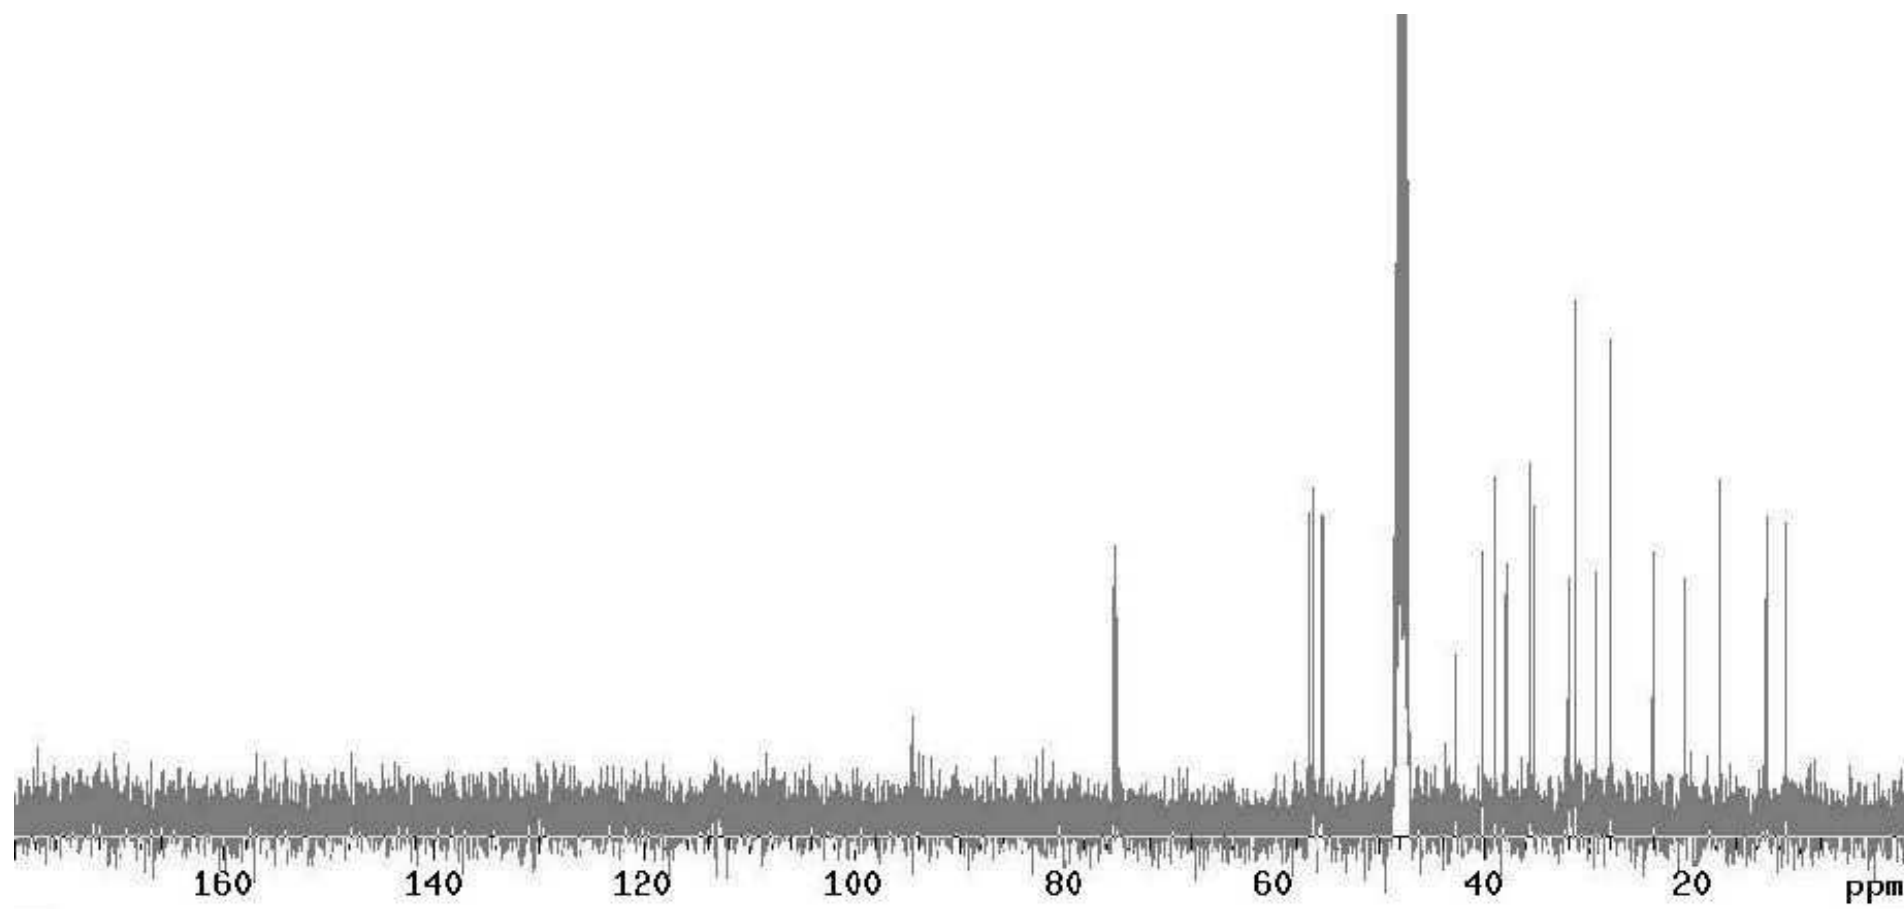

$^1\text{H}$  NMR (400 MHz,  $\text{CD}_3\text{OD}$ ) of **4**

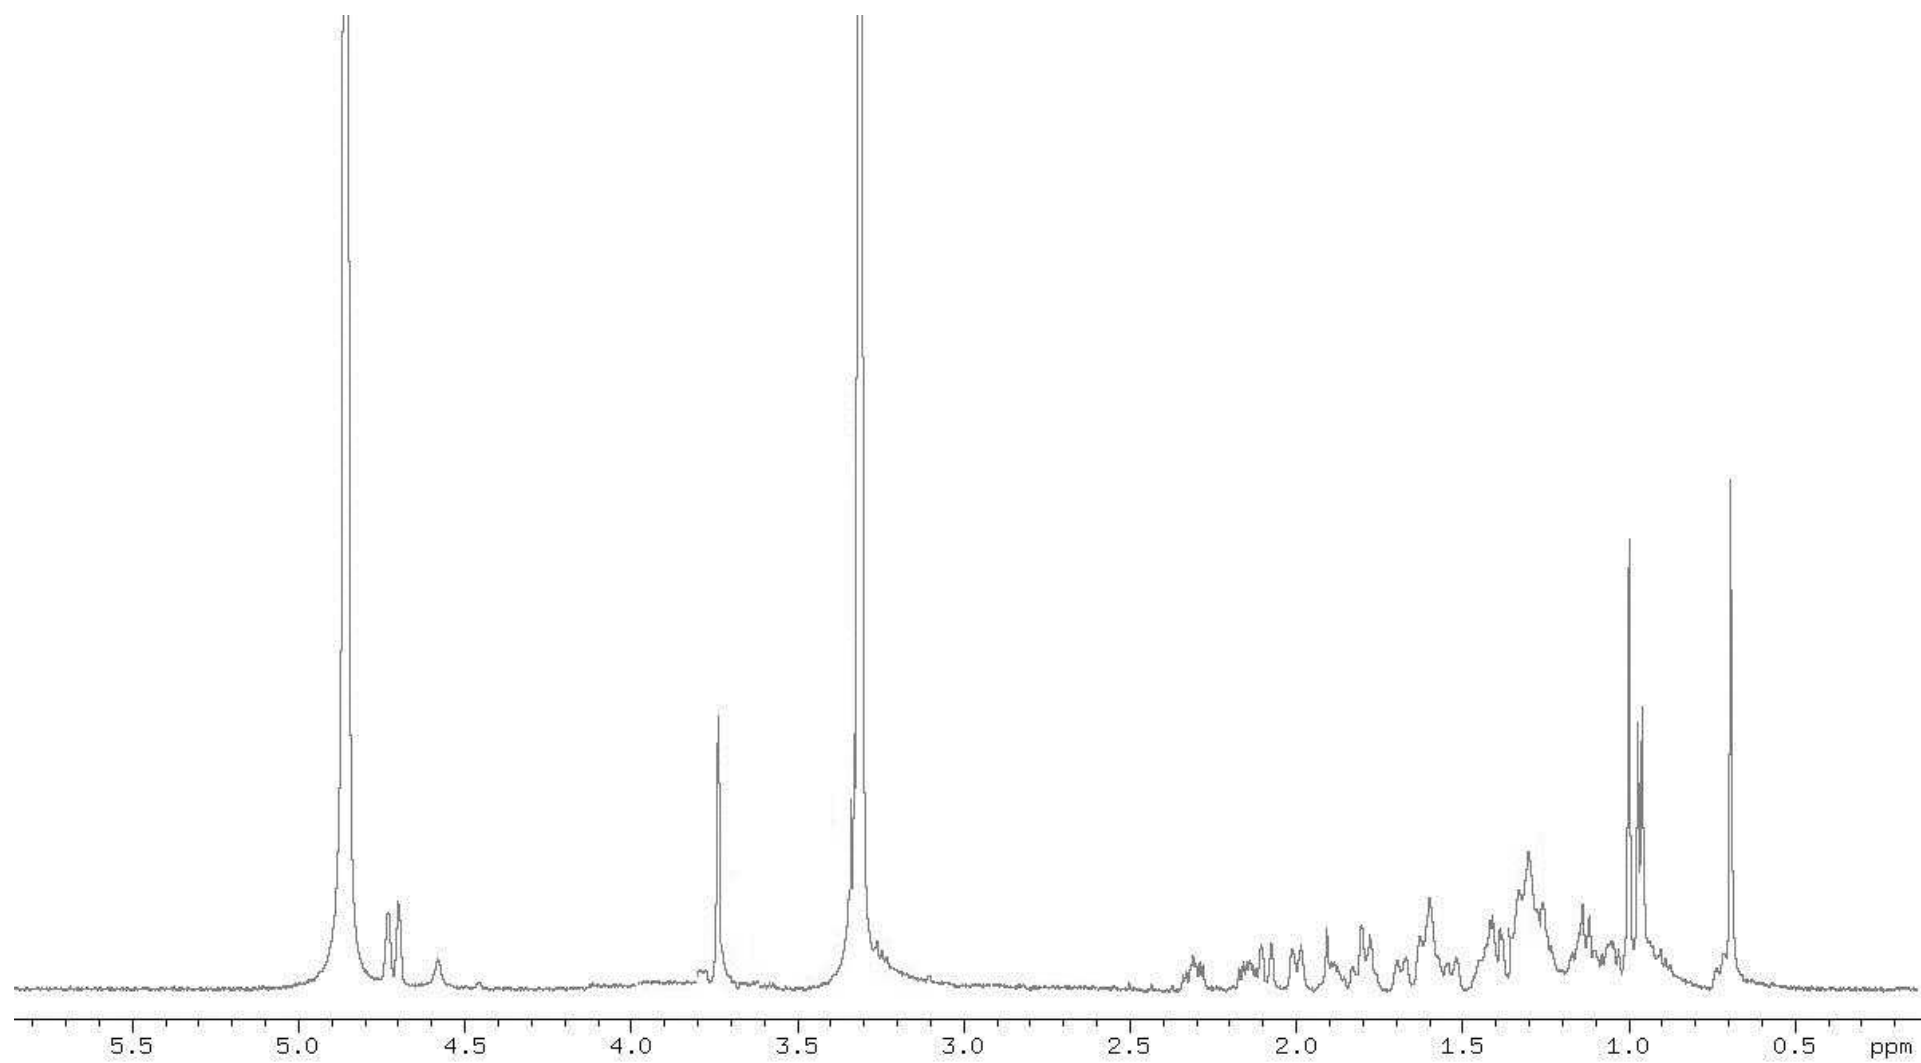

$^{13}\text{C}$  NMR (100 MHz,  $\text{CD}_3\text{OD}$ ) of **4**

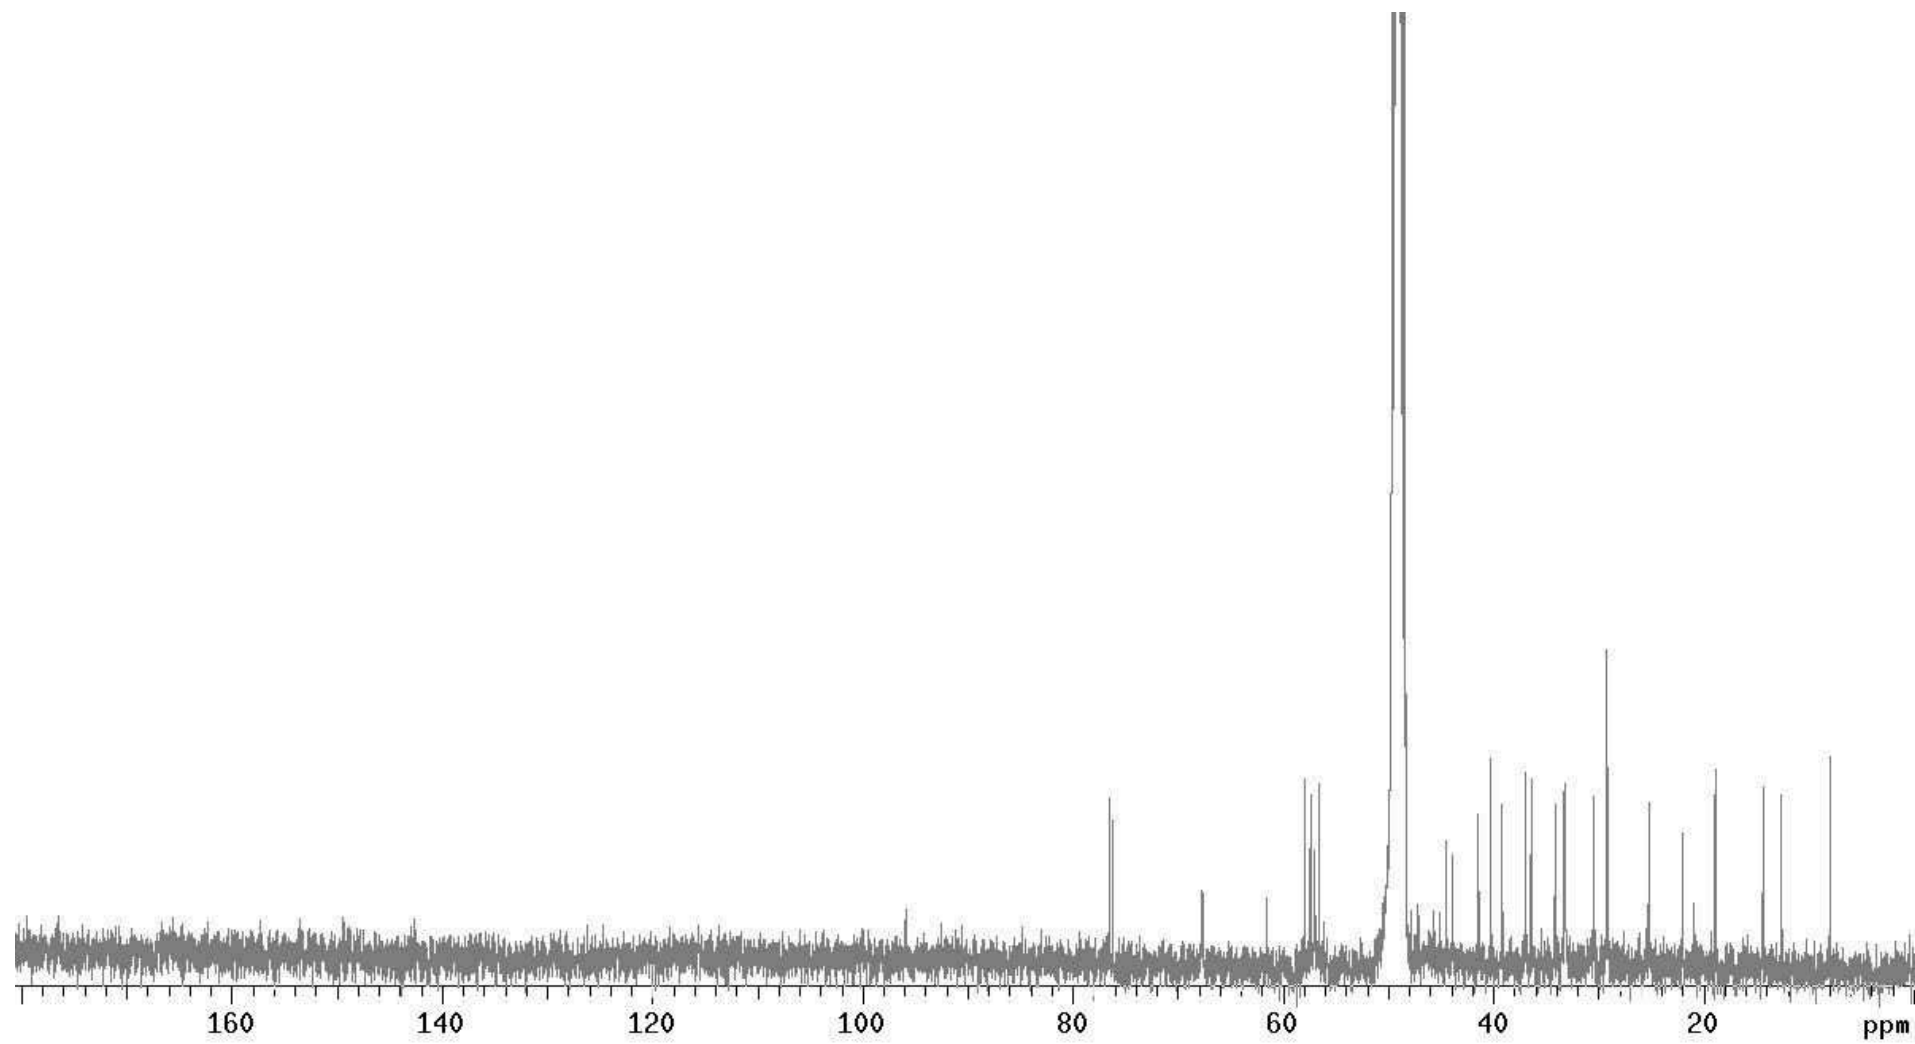

$^1\text{H}$  NMR (400 MHz,  $\text{CD}_3\text{OD}$ ) of **5**

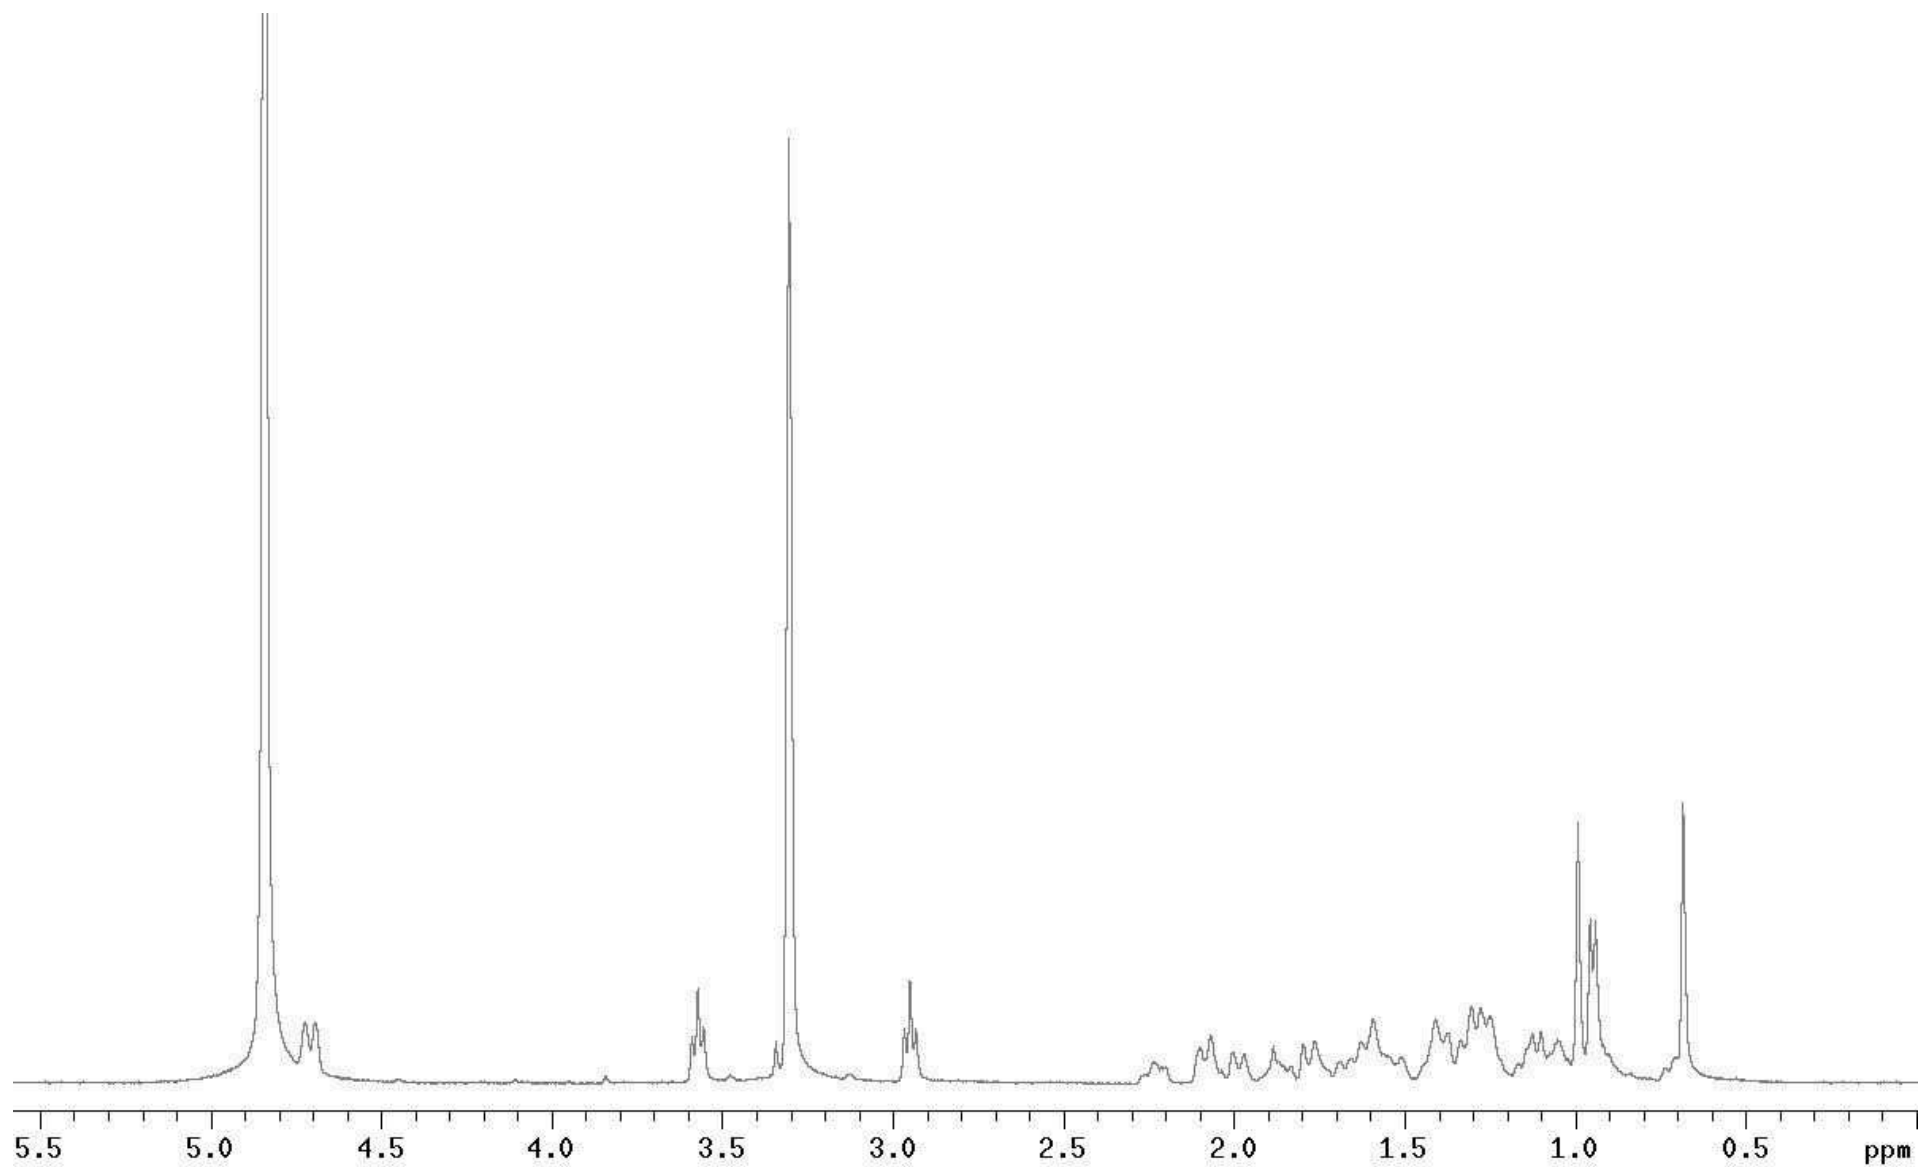

$^{13}\text{C}$  NMR (100 MHz,  $\text{CD}_3\text{OD}$ ) of **5**

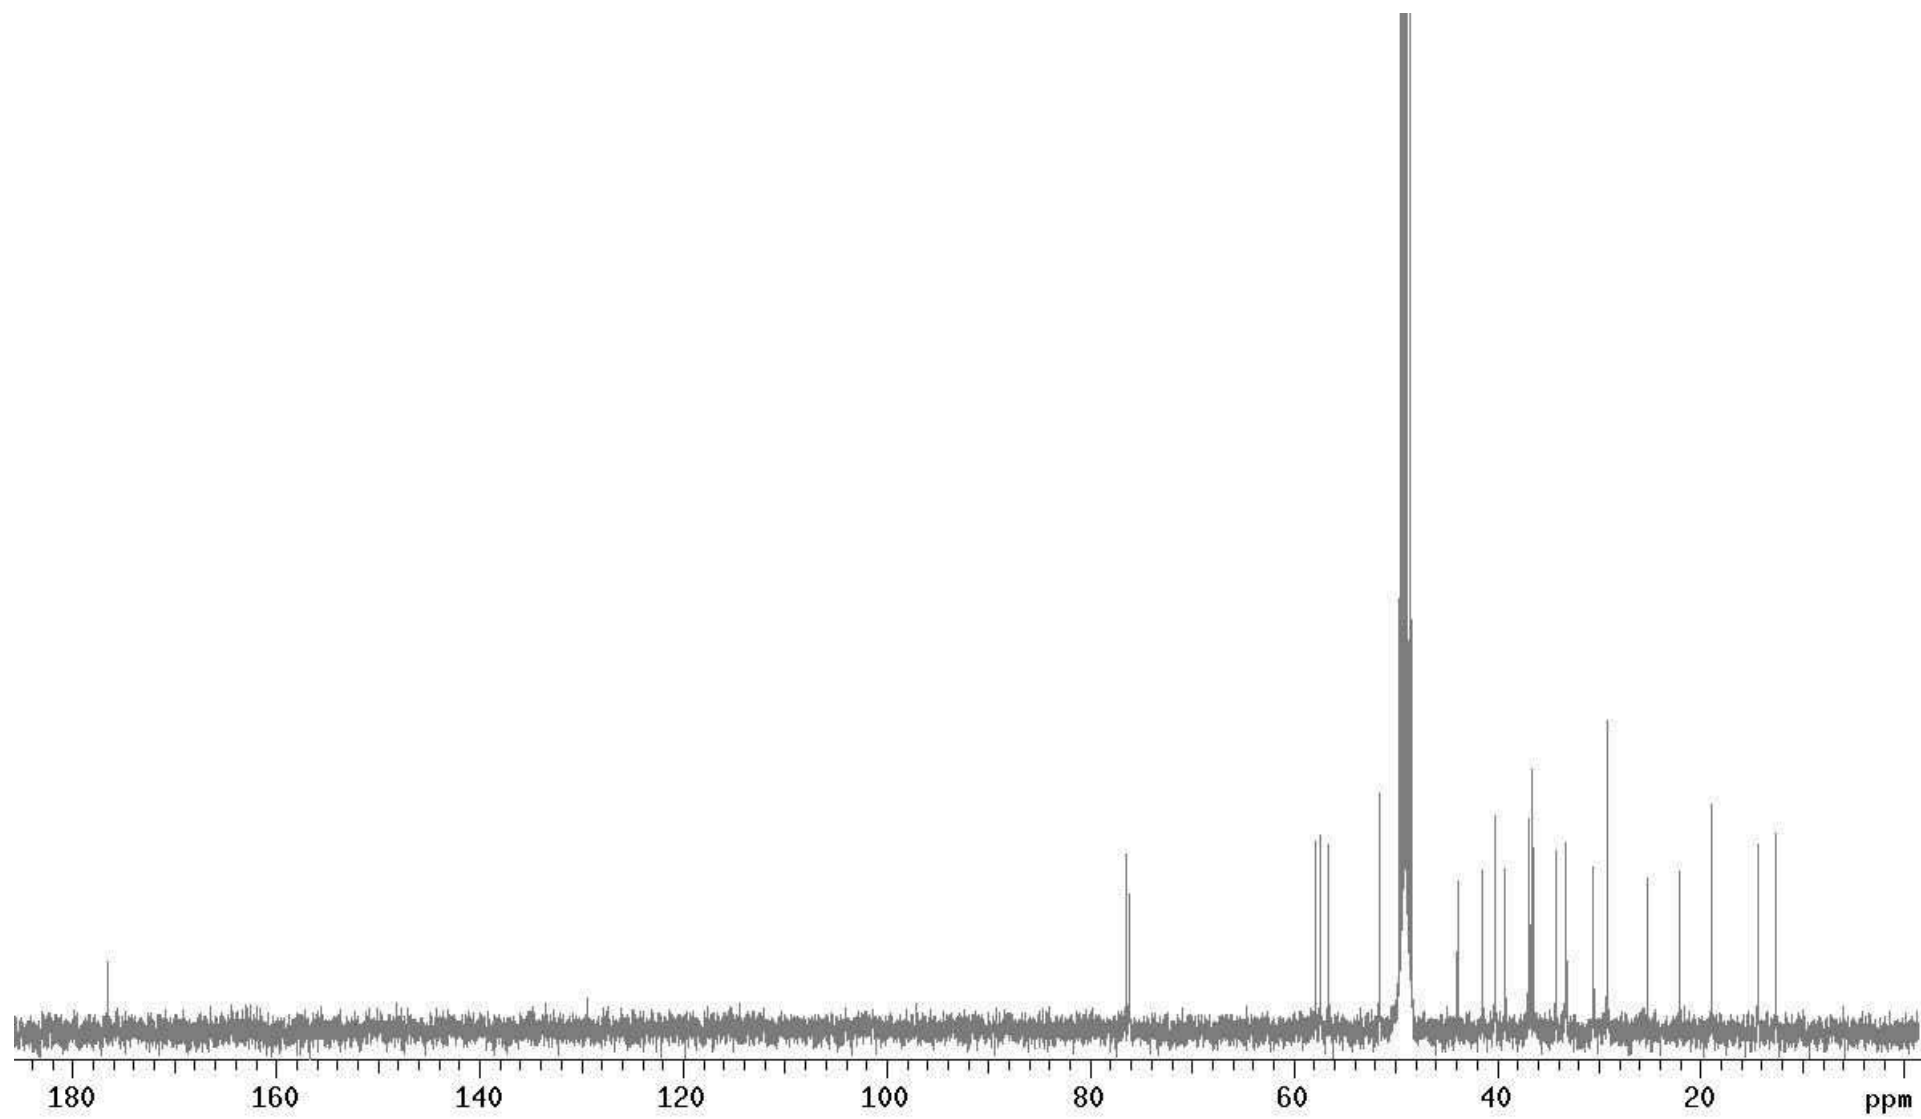



$^1\text{H}$  NMR (400 MHz,  $\text{CD}_3\text{OD}$ ) of **6**

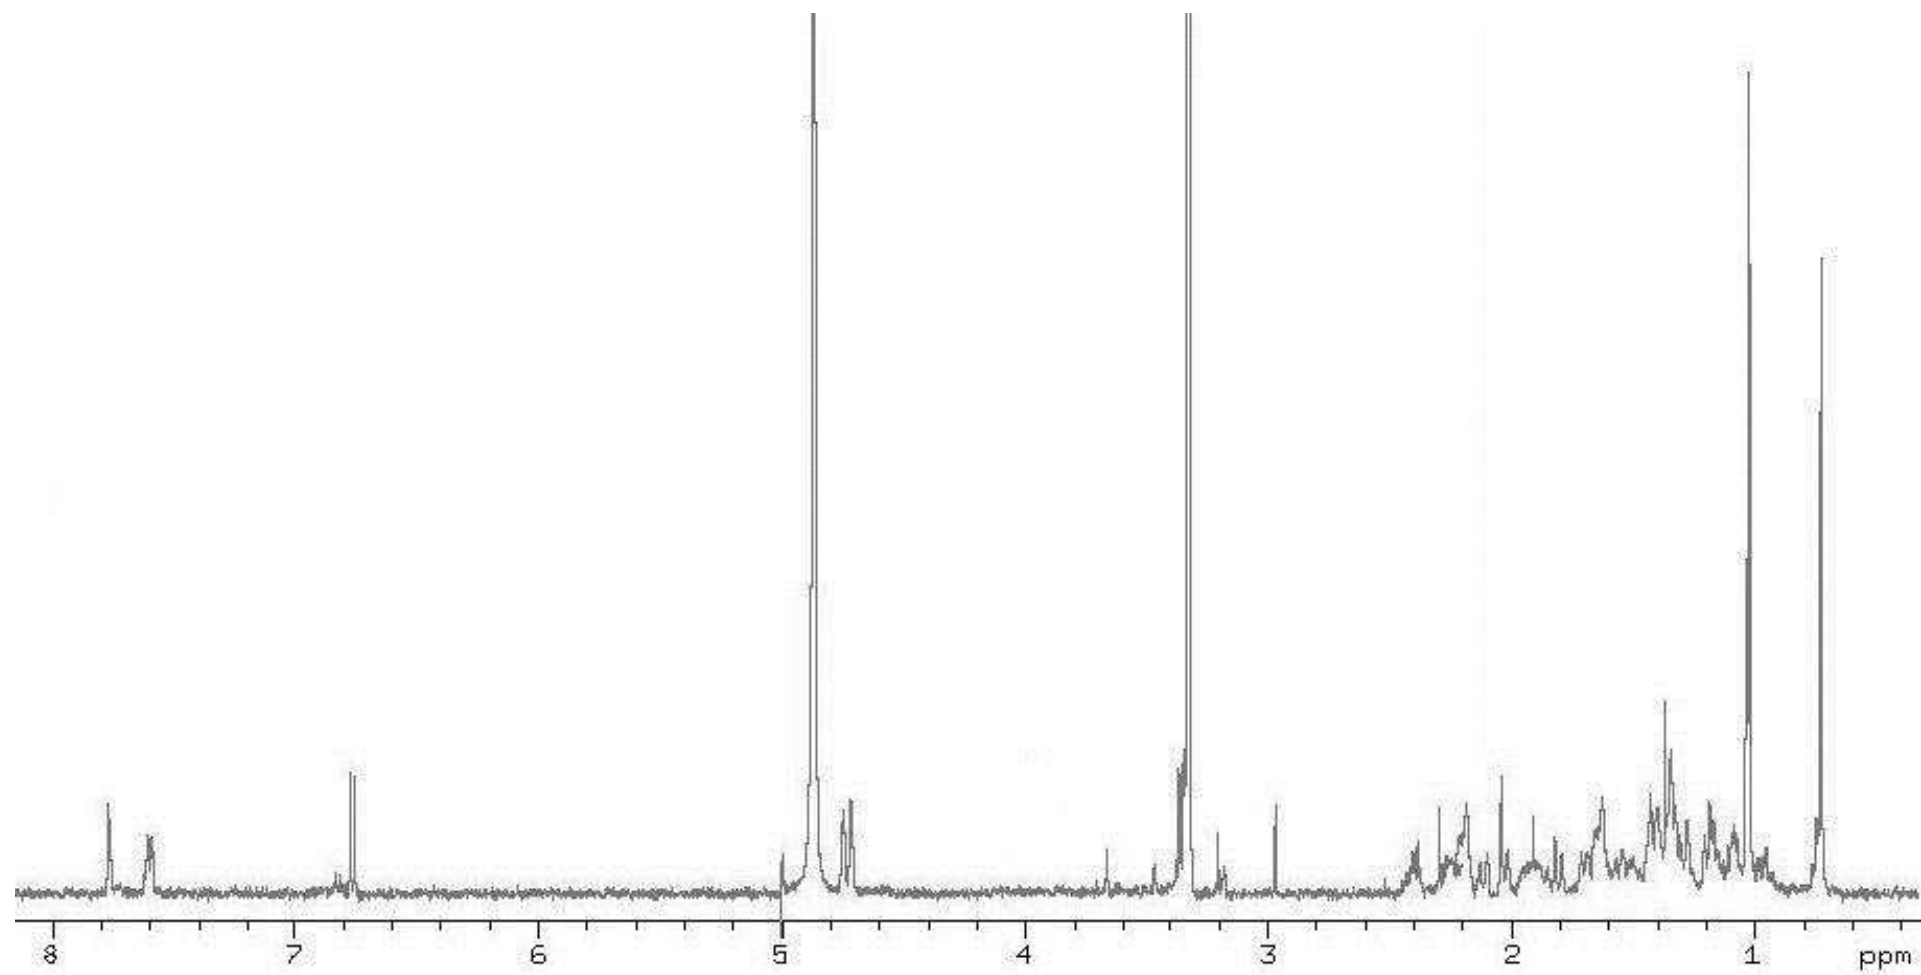

$^{13}\text{C}$  NMR (100 MHz,  $\text{CD}_3\text{OD}$ ) of **6**

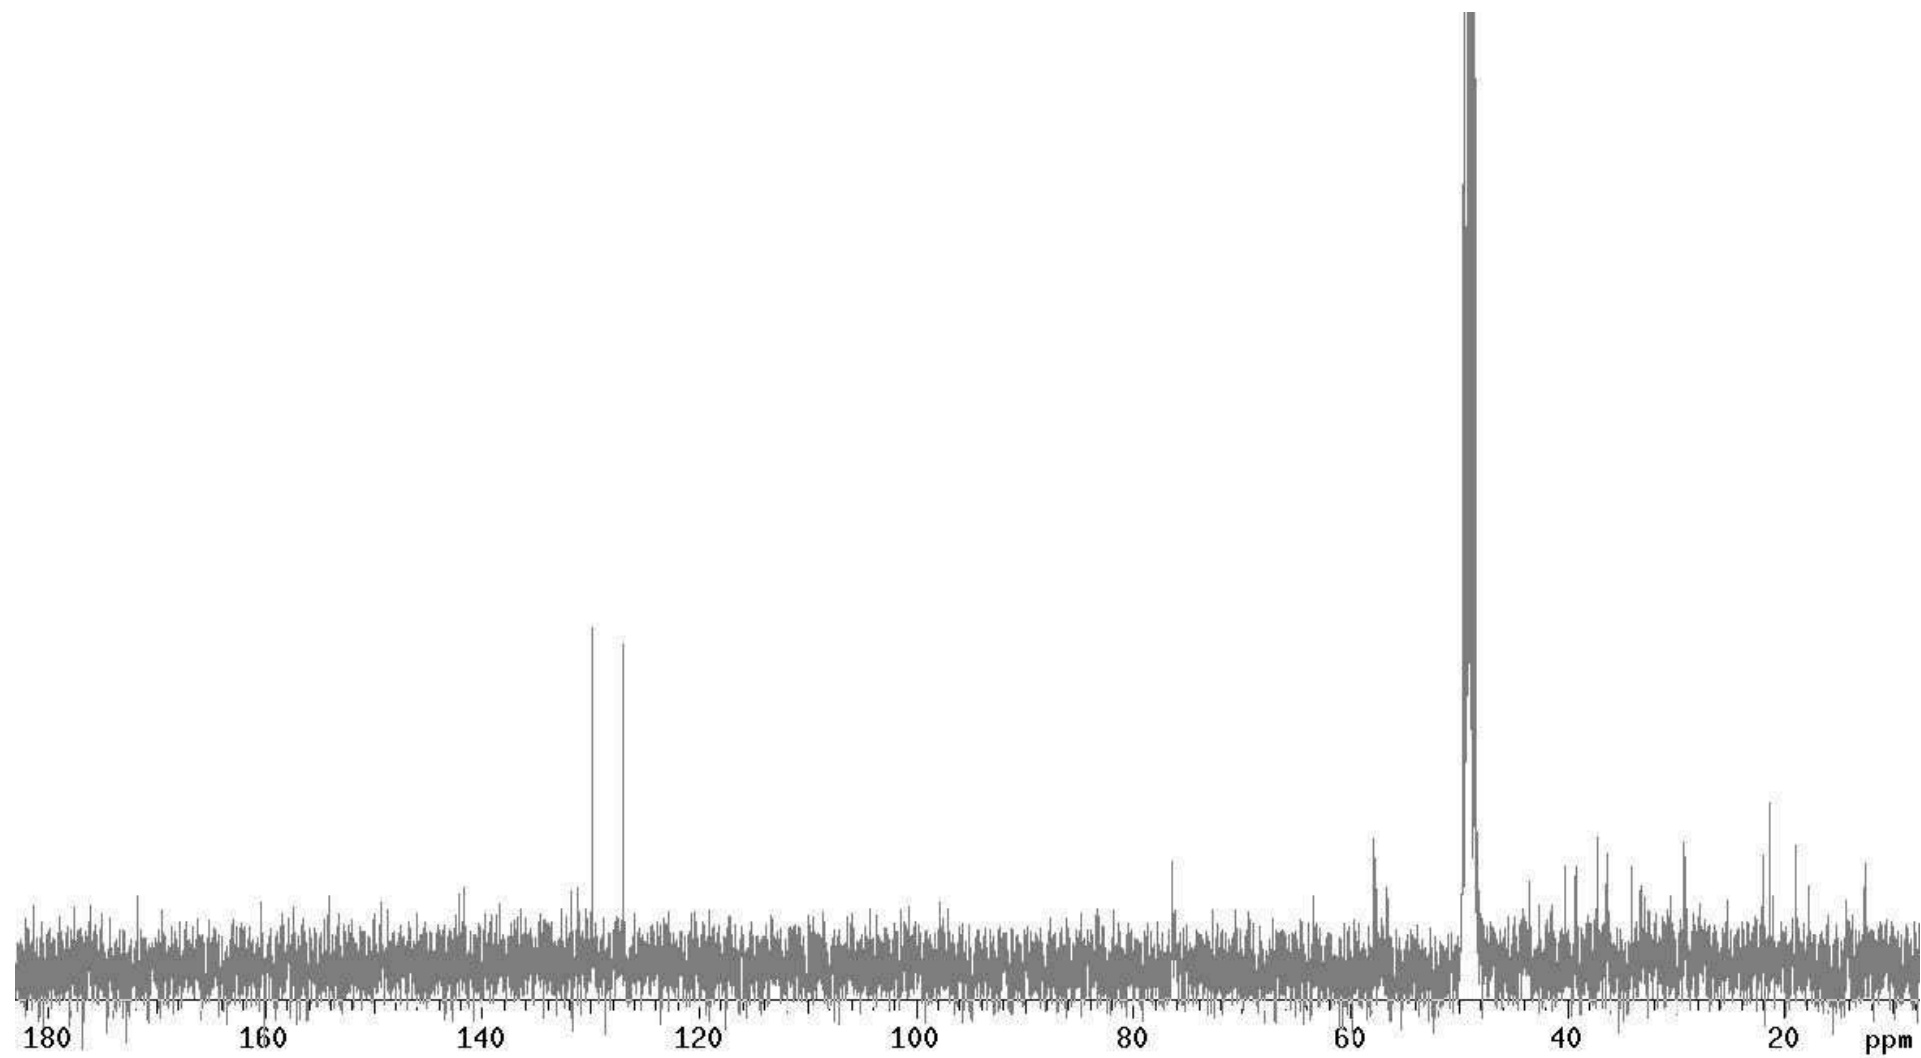

$^1\text{H}$  NMR (400 MHz,  $\text{CD}_3\text{OD}$ ) of **7**

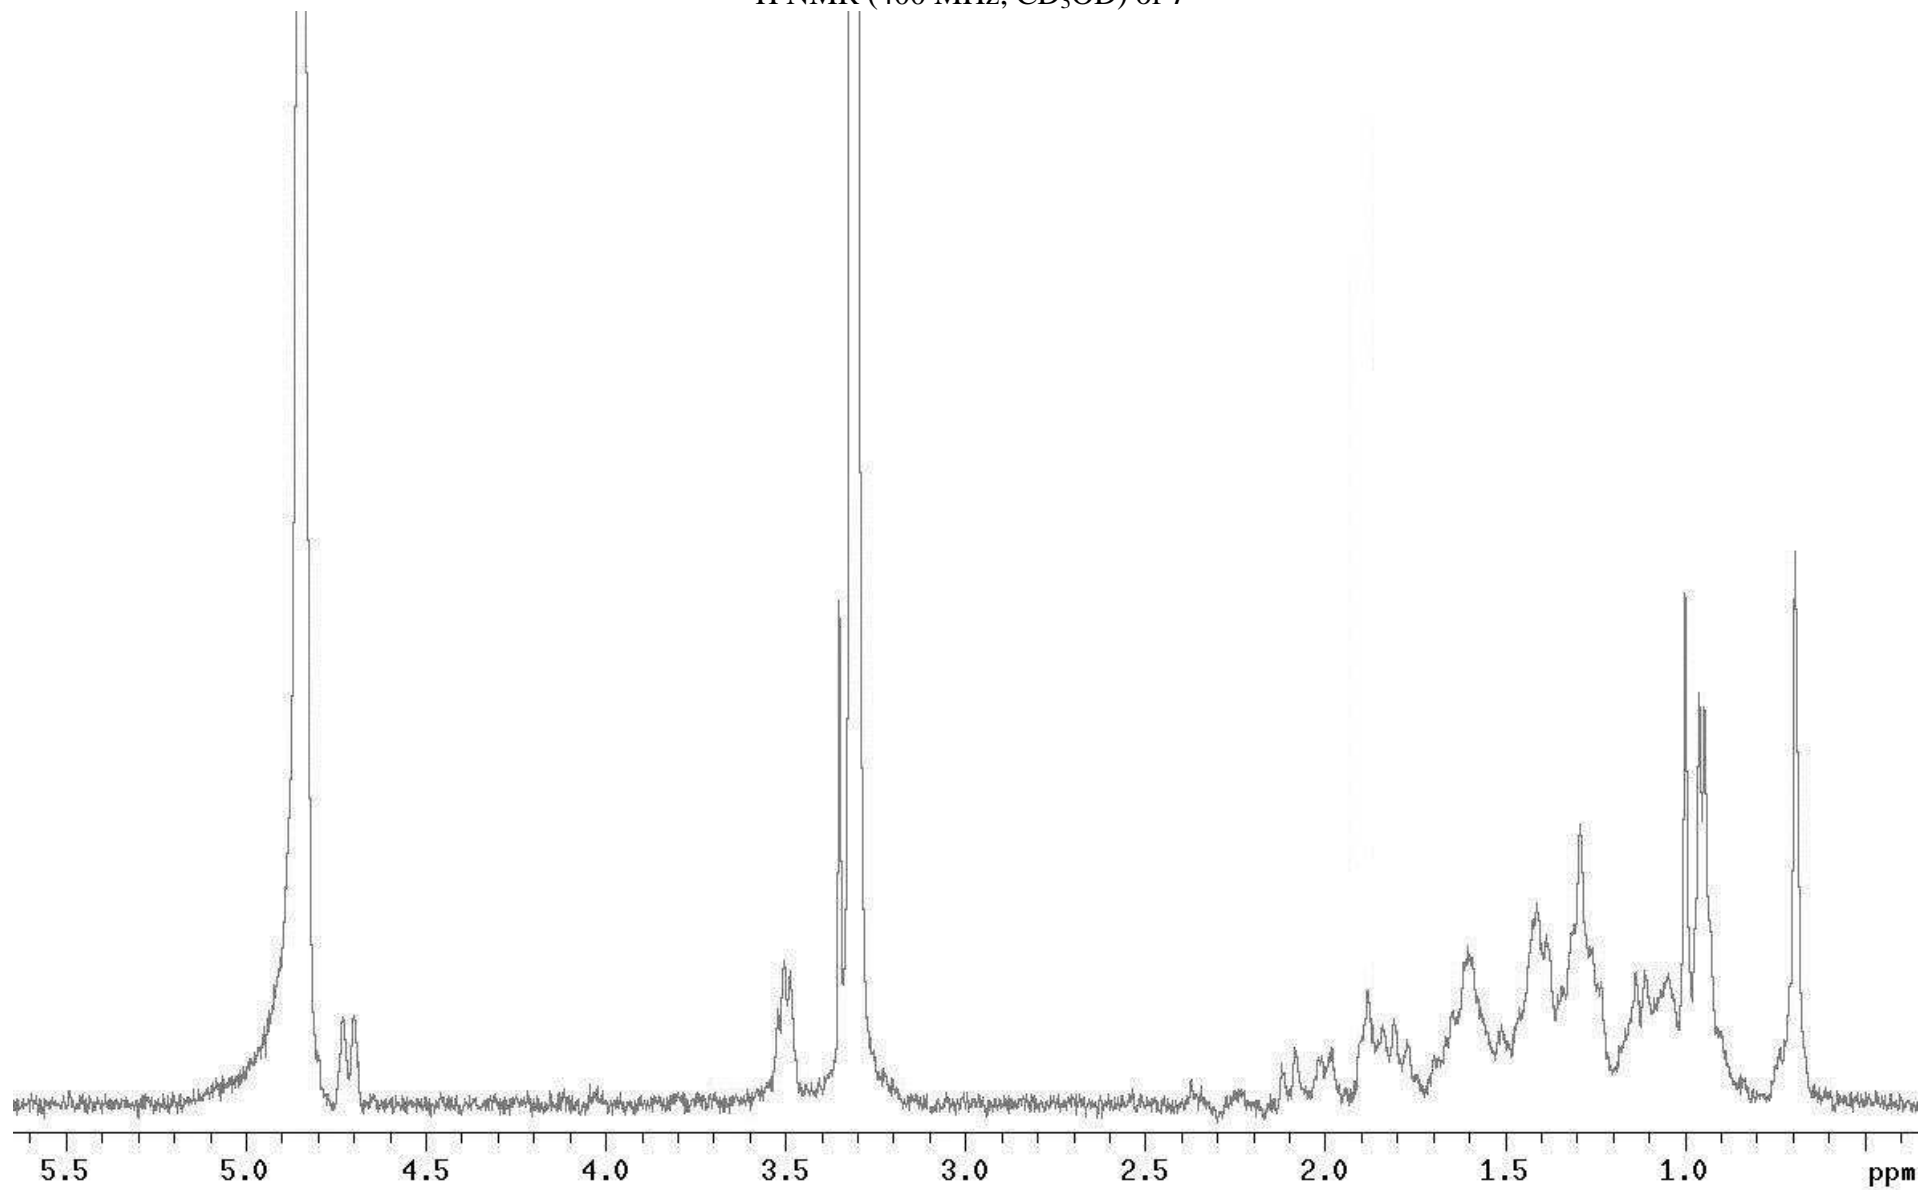

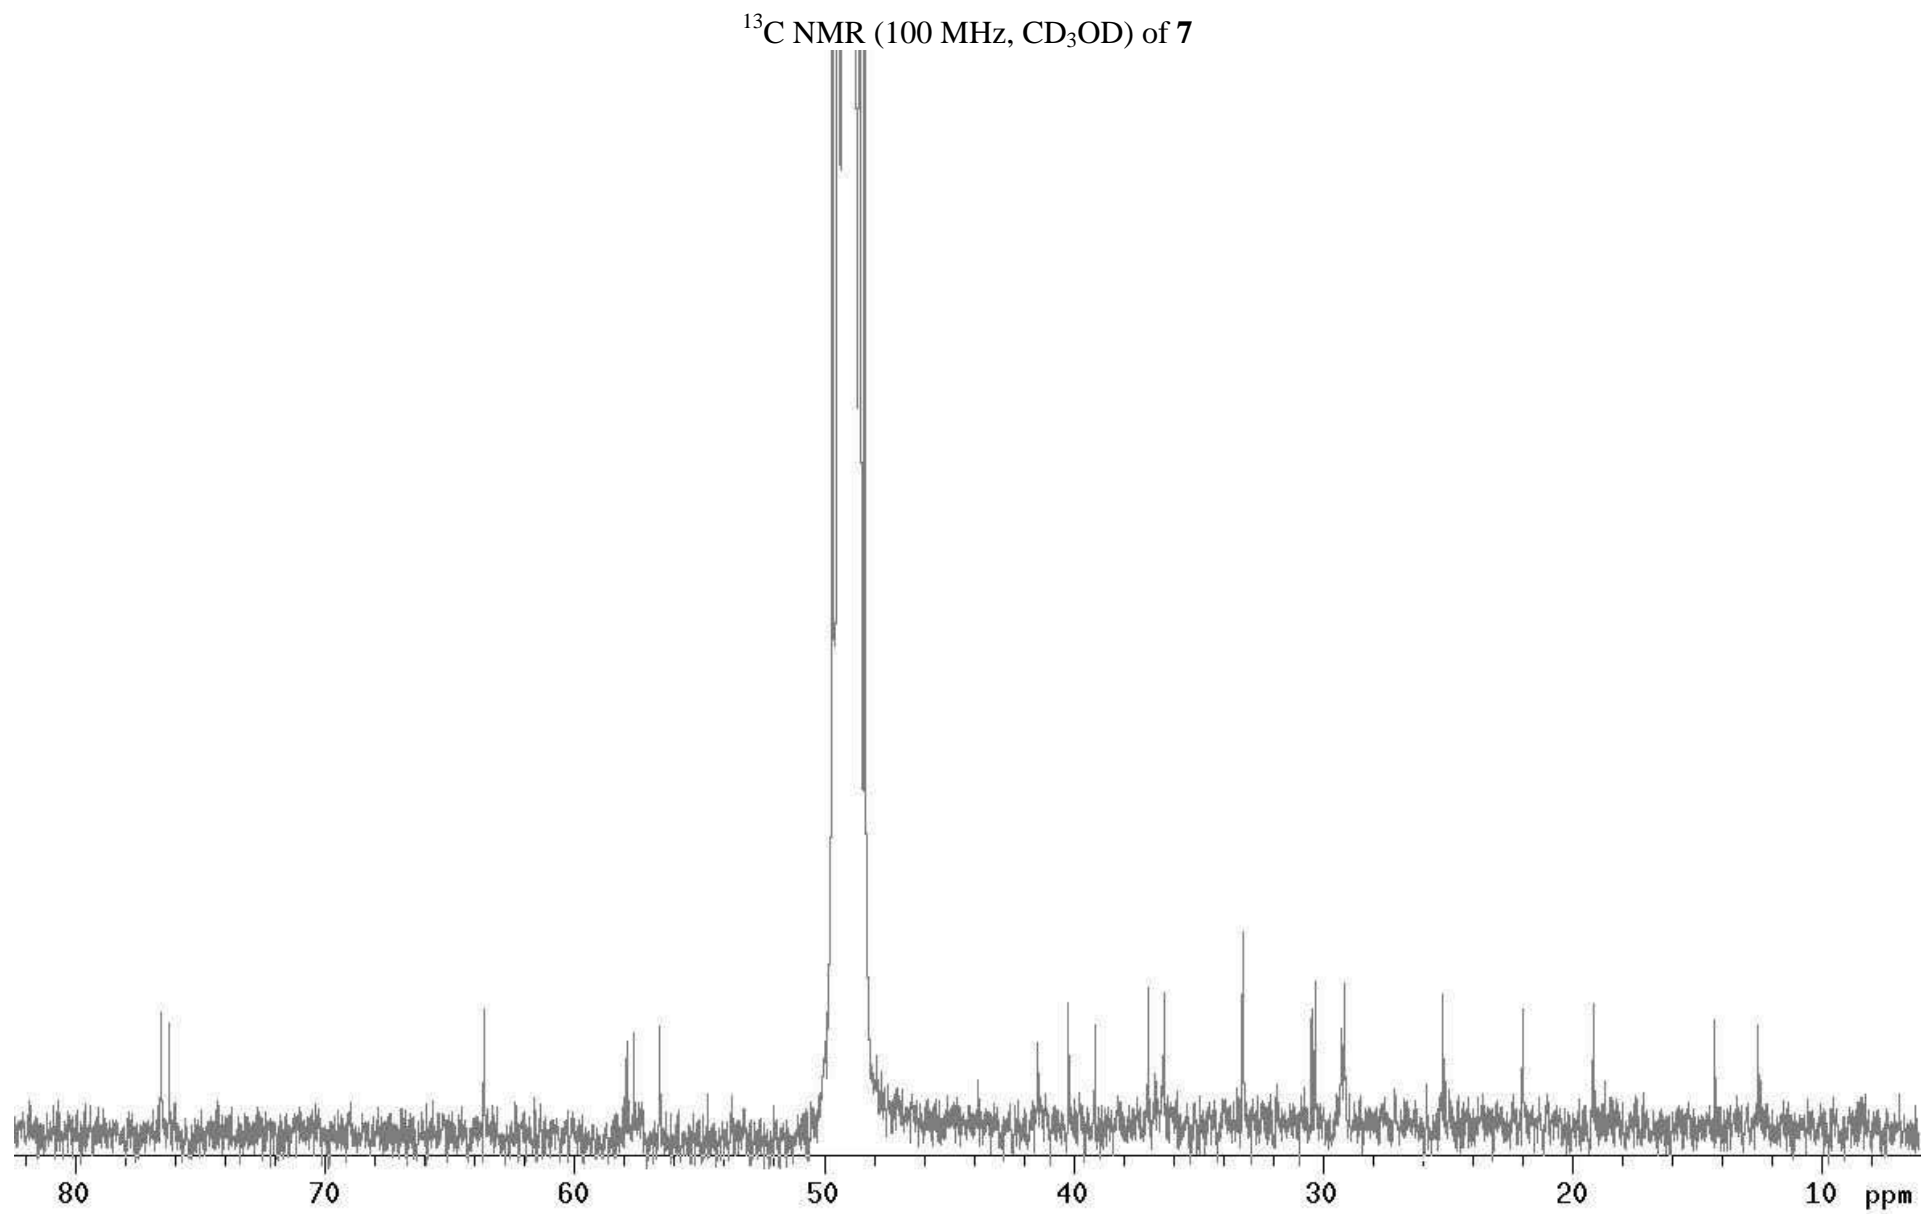

$^1\text{H}$  NMR (400 MHz,  $\text{CD}_3\text{OD}$ ) of **8**

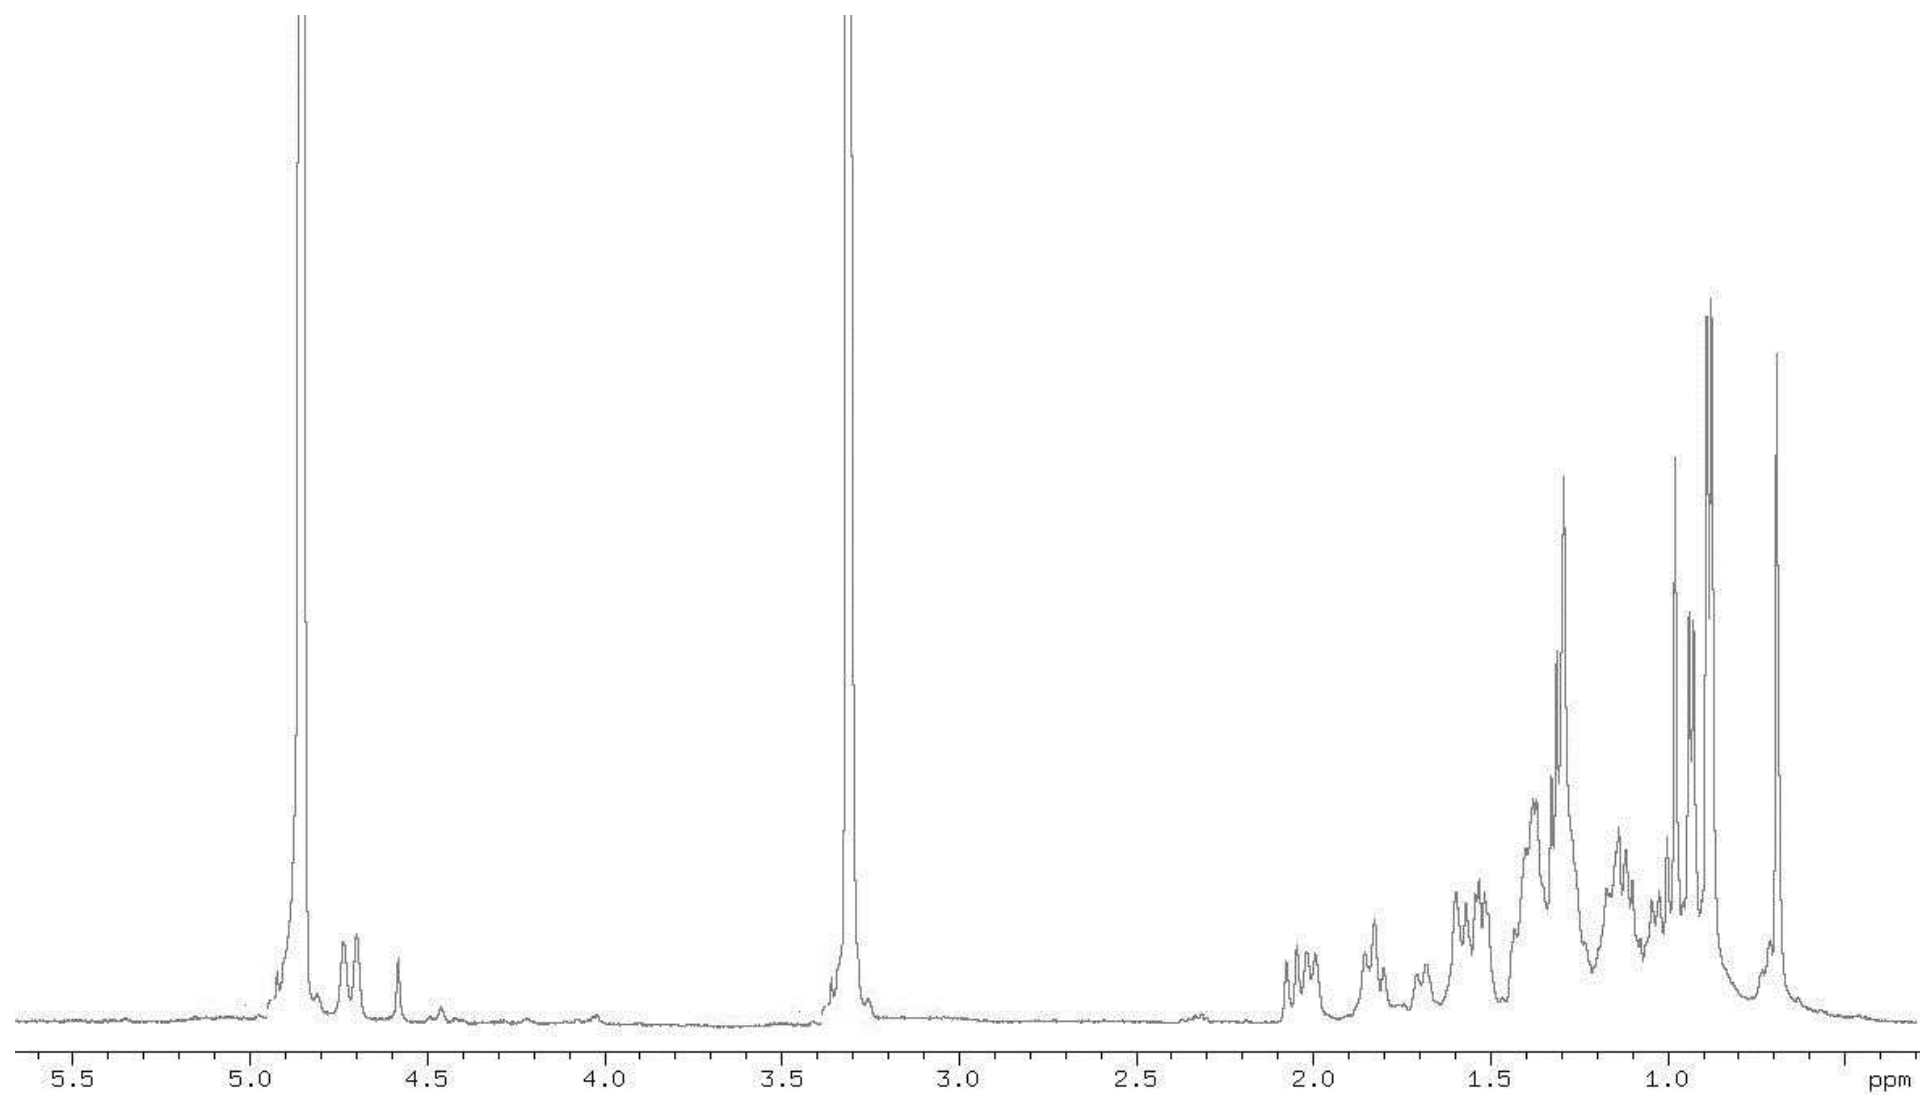

$^{13}\text{C}$  NMR (100 MHz,  $\text{CD}_3\text{OD}$ ) of **8**

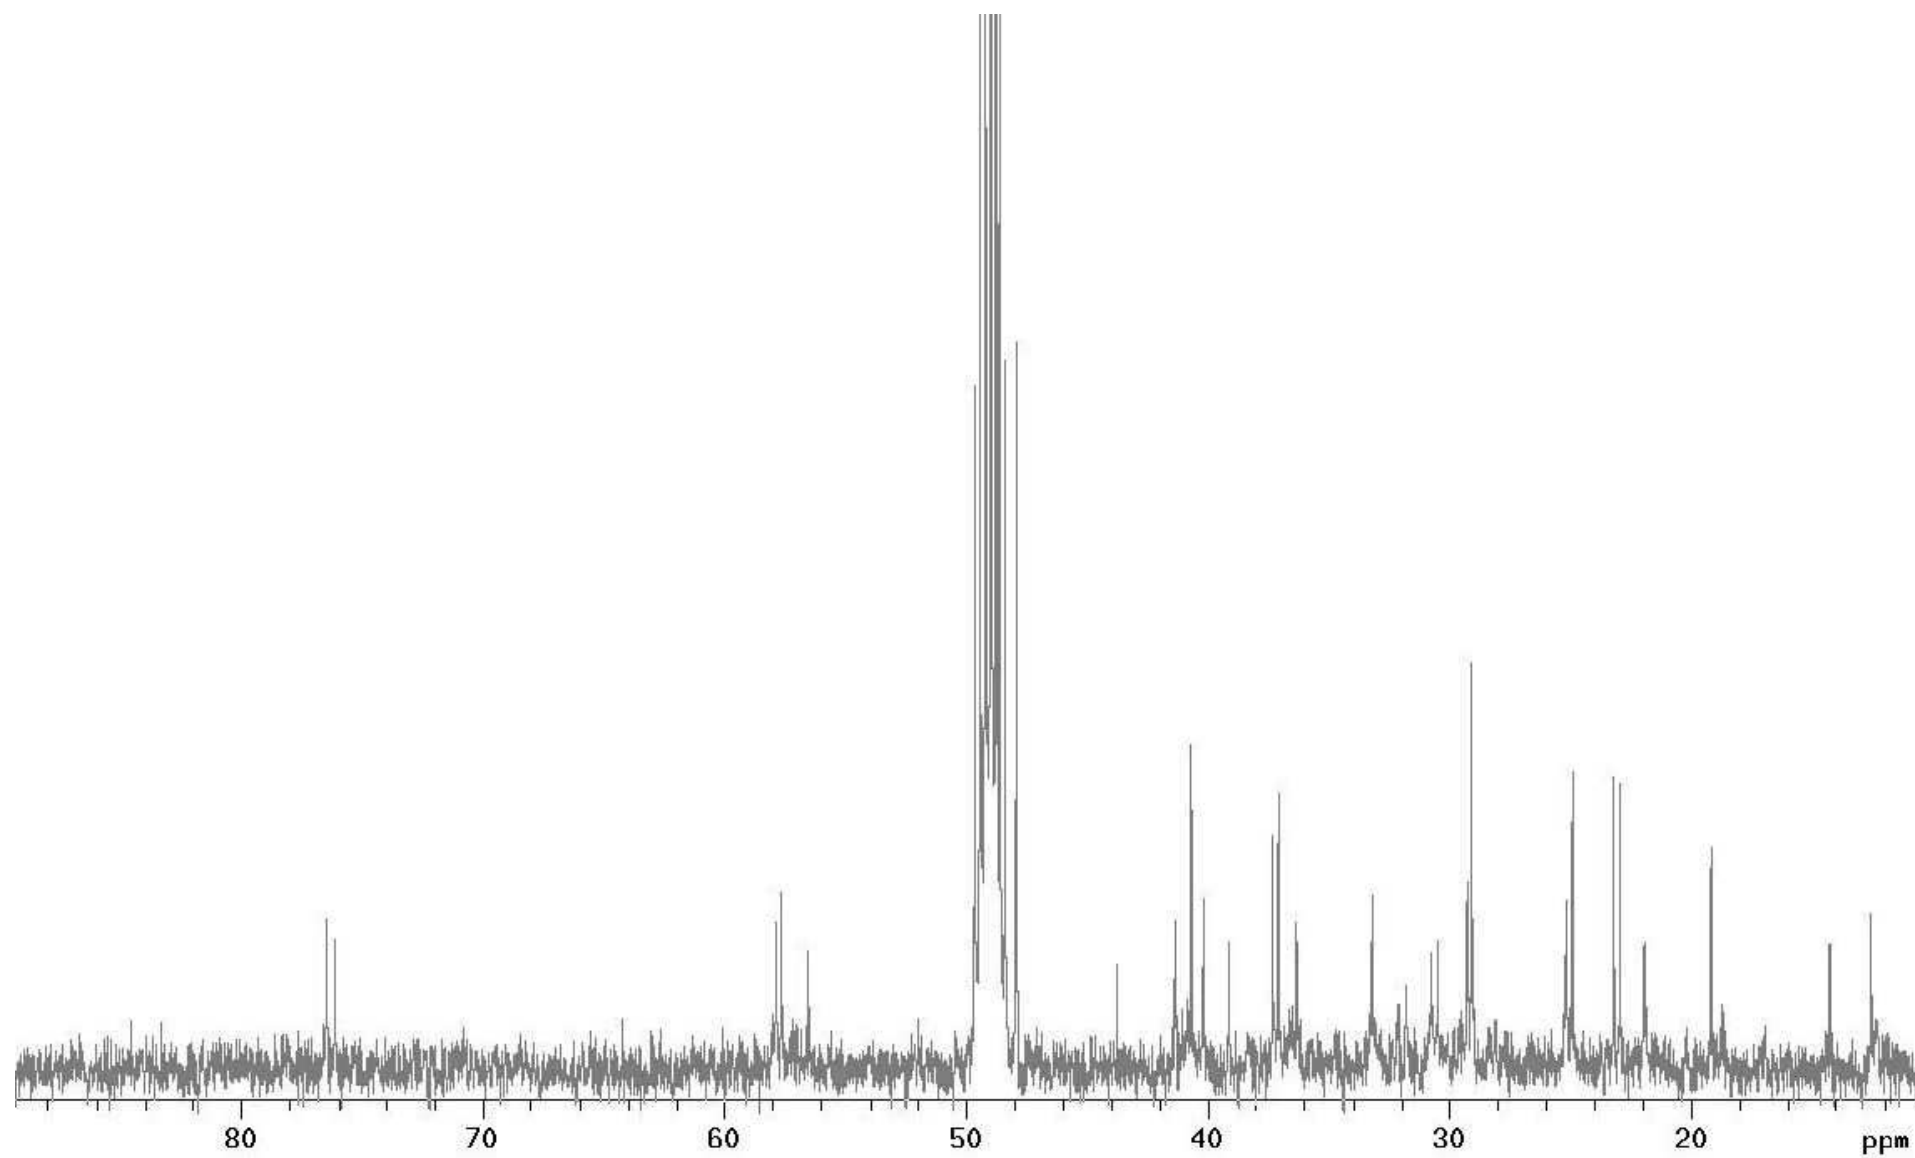

$^1\text{H}$  NMR (400 MHz,  $\text{CD}_3\text{OD}$ ) of **9**

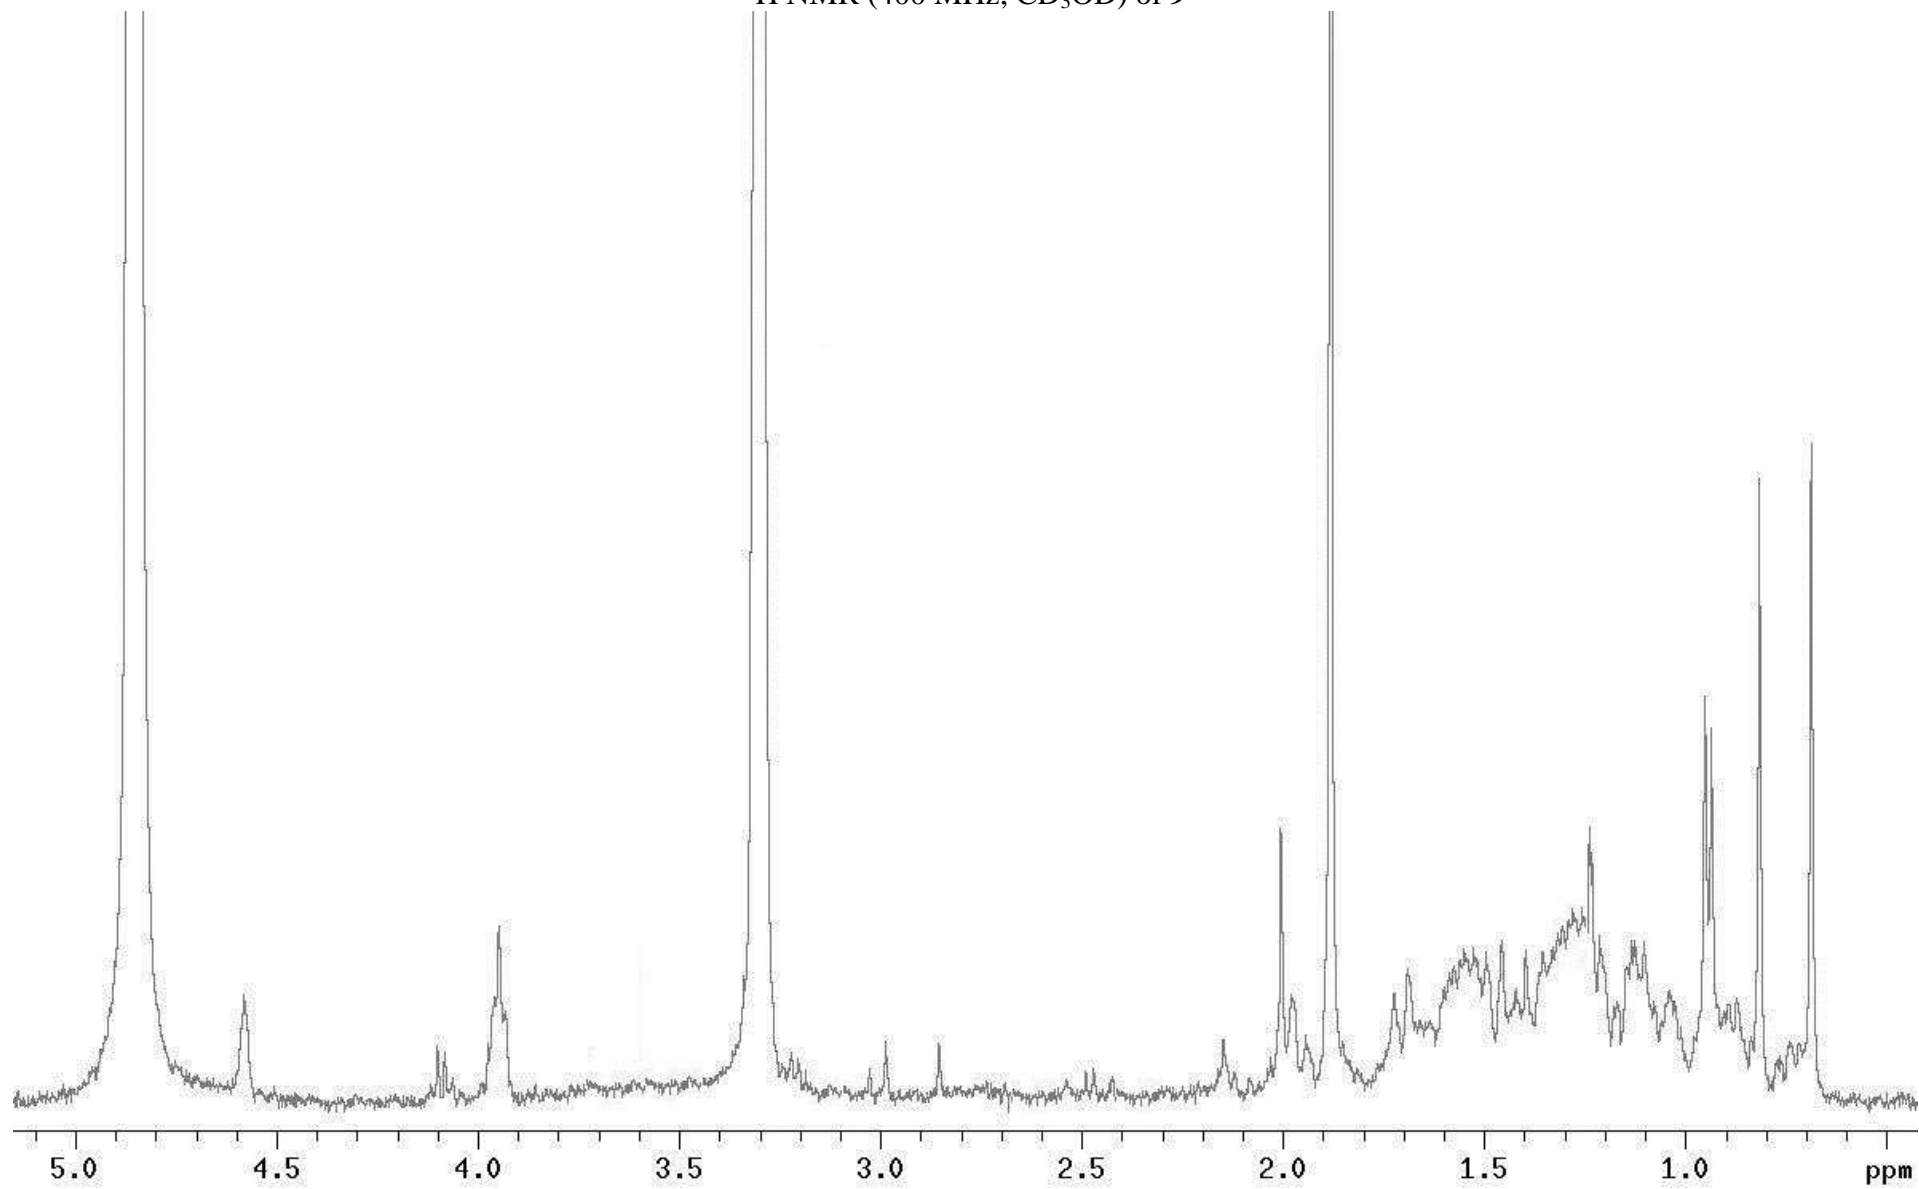

$^1\text{H}$  NMR (400 MHz,  $\text{CD}_3\text{OD}$ ) of **10**

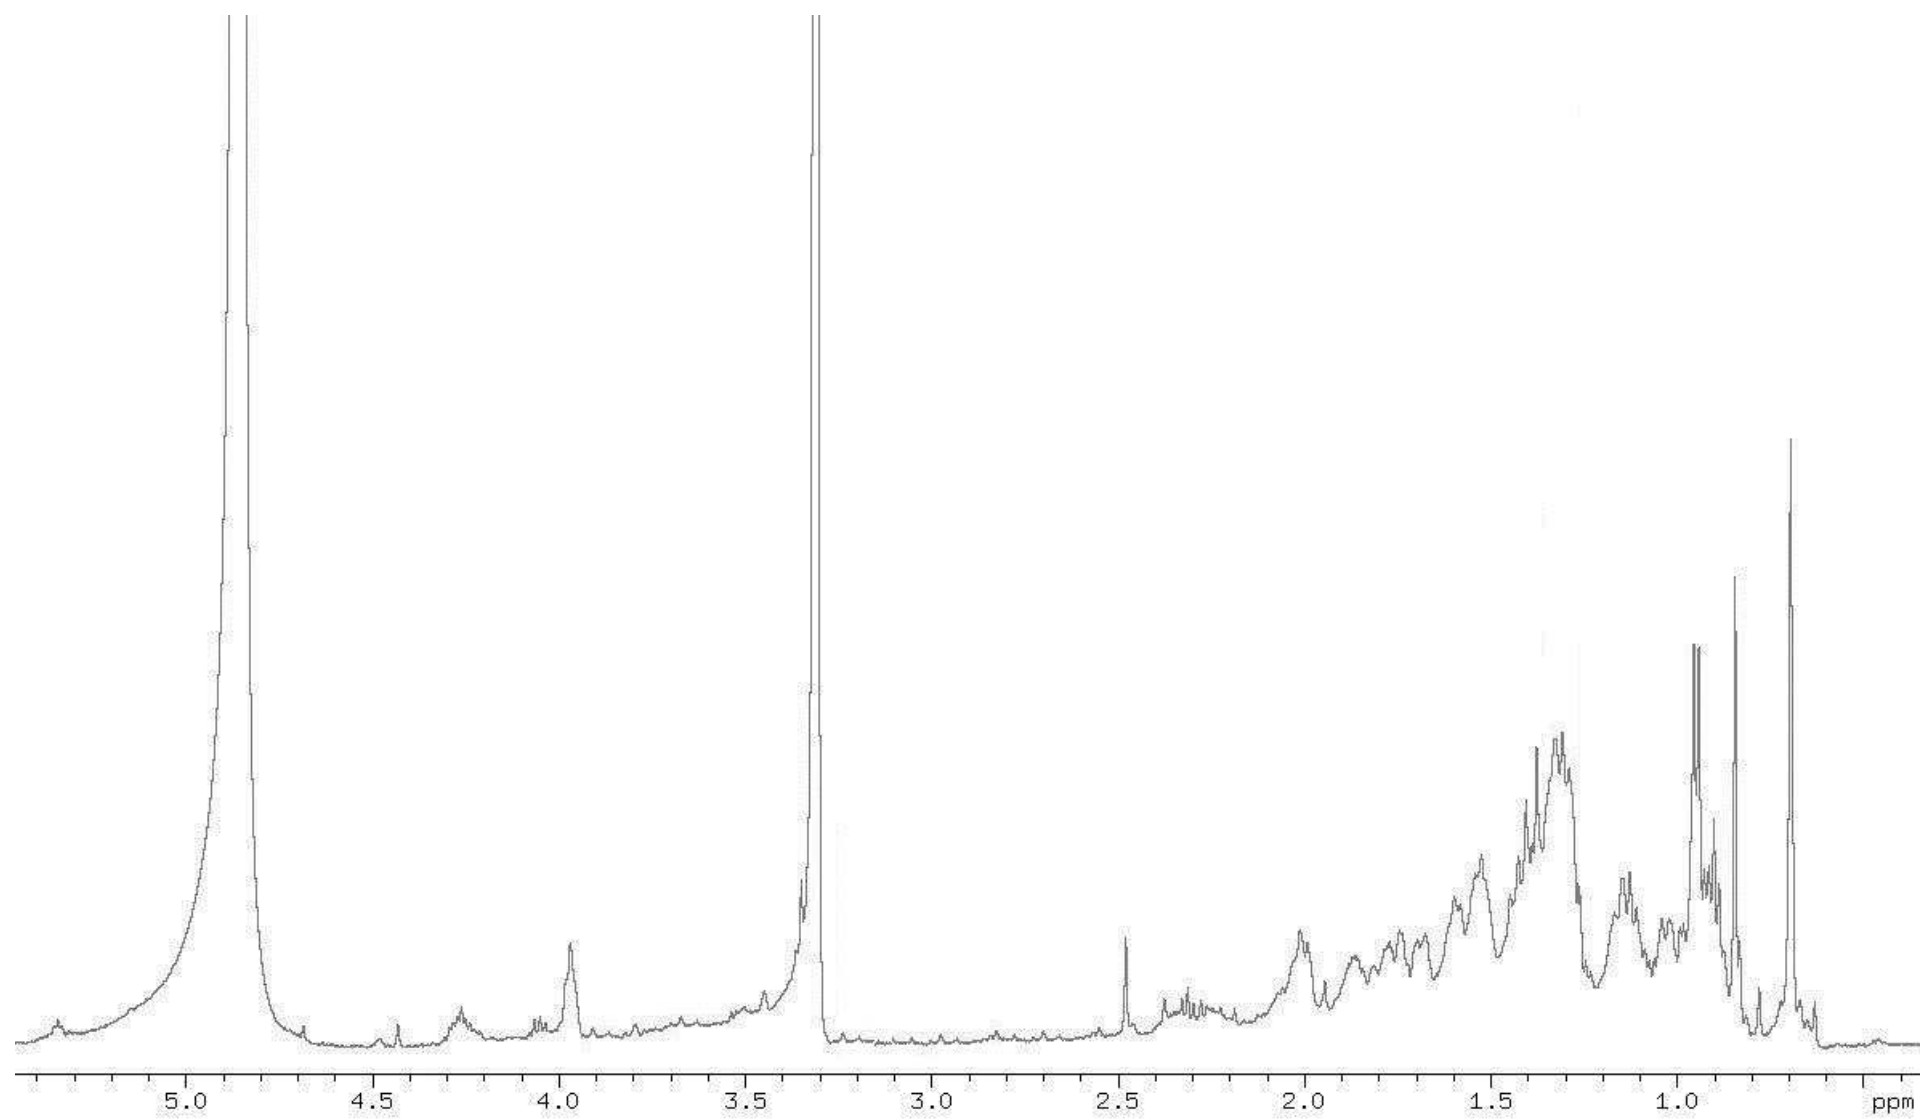



HPLC trace of **2** on a Nucleodur 100-5 C18 (5 $\mu$ m; 4.6 mm i.d. x 250 mm) with MeOH:H<sub>2</sub>O (34:66) as eluent (flow rate 1.5 mL/min)  $t_R$ =3.6 min.

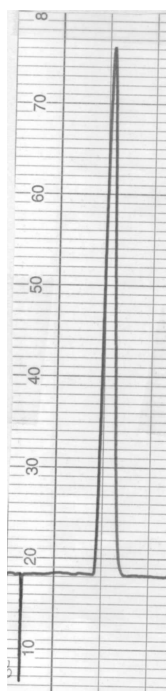

HPLC trace of **3** on a Nucleodur 100-5 C18 (5 $\mu$ m; 4.6 mm i.d. x 250 mm) with MeOH:H<sub>2</sub>O (30:70) as eluent (flow rate 1.5 mL/min)  $t_R$ =3.6 min.

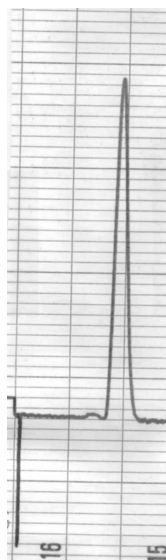

HPLC trace of **4**, **5** and **6** on a Nucleodur 100-5 C18 (5 $\mu$ m; 4.6 mm i.d. x 250 mm) with MeOH:H<sub>2</sub>O (30:70) as eluent (flow rate 1.5 mL/min)  $t_R=3.4$  min.

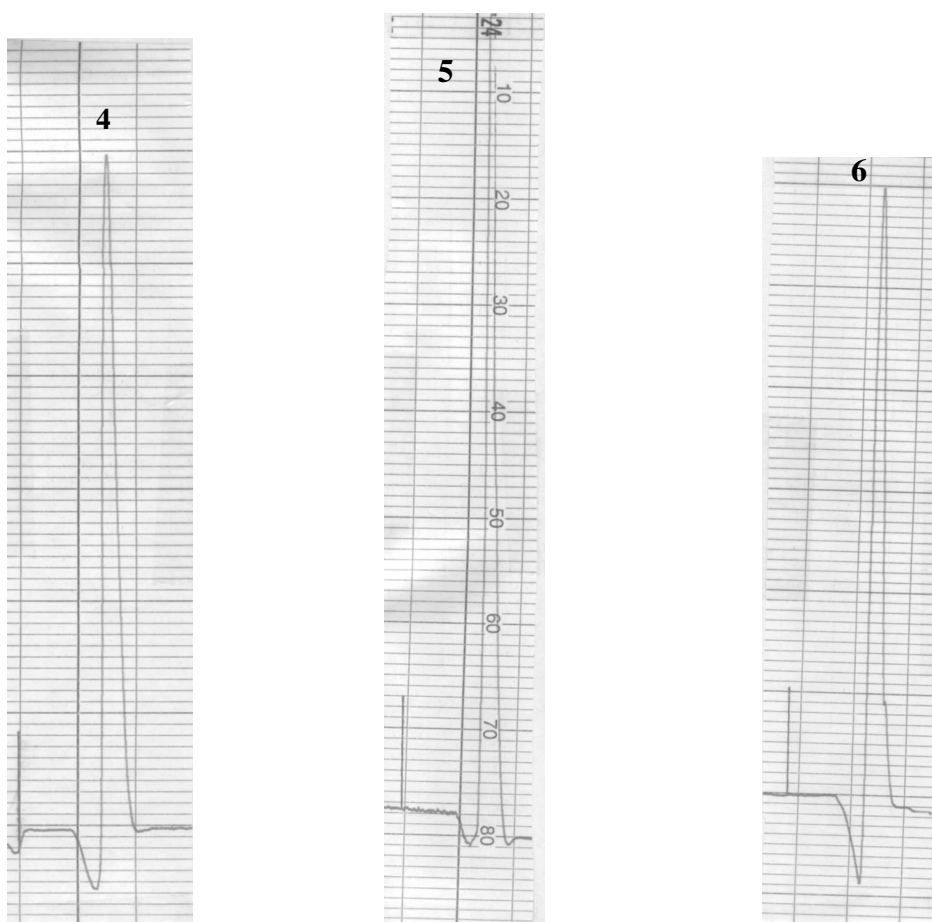

HPLC trace of **7** on a Nucleodur 100-5 C18 (5 $\mu$ m; 4.6 mm i.d. x 250 mm) with MeOH:H<sub>2</sub>O (32:68) as eluent (flow rate 1.5 mL/min)  $t_R=3.2$  min.

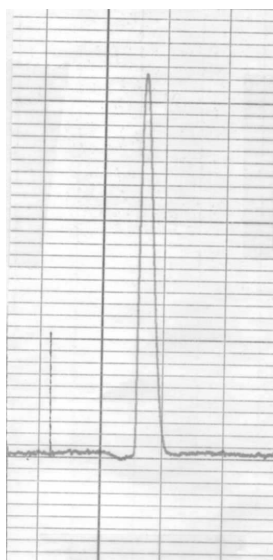

HPLC trace of **8** on a Nucleodur 100-5 C18 (5 $\mu$ m; 4.6 mm i.d. x 250 mm) with MeOH:H<sub>2</sub>O (87:13) as eluent (flow rate 1.5 mL/min)  $t_R$ =2.6 min.

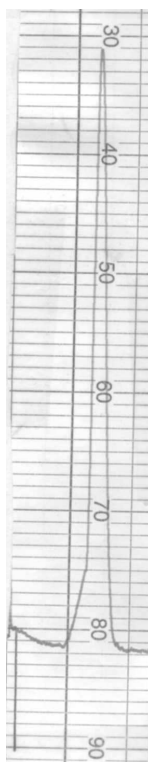

HPLC trace of **9** and **10** on a Nucleodur 100-5 C18 (5 $\mu$ m; 4.6 mm i.d. x 250 mm) with MeOH:H<sub>2</sub>O (25:75) as eluent (flow rate 1.5 mL/min)  $t_R$ =2.4 min).

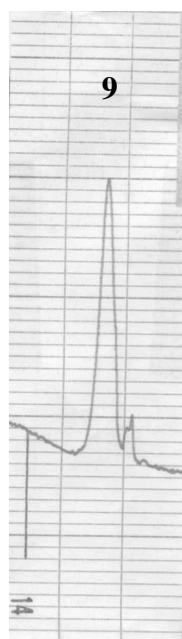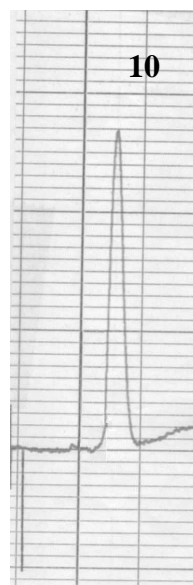

HPLC trace of **11** on a Nucleodur 100-5 C18 (5 $\mu$ m; 4.6 mm i.d. x 250 mm) with MeOH:H<sub>2</sub>O  
(87:13) as eluent (flow rate 1.5 mL/min)  $t_R$ =2.6 min.

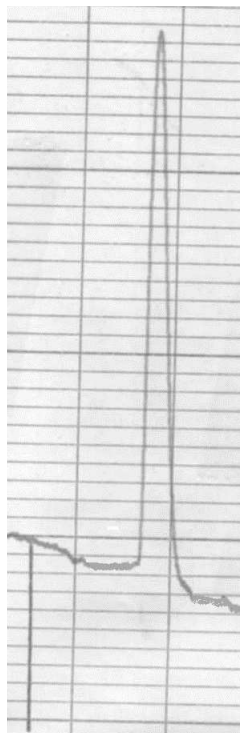

Supplement: c2ob25800e.pdf [file c2ob25800e.pdf]
